# Supplementary material
Source: Research Square preprint supplement (doi:10.21203/rs.3.rs-8817689/v1)
Supplement: Supplementary file 1 [file d202fd61588b8dc04c715d20.docx]

**Table 1:** Categorisation of water samples based on EWQI Ranking.

| EWQI Category | Rank | Water Quality | No. of Samples | % Samples |
| --- | --- | --- | --- | --- |
| <50 | 1 | Excellent | 1 | 2.5% |
| 50-100 | 2 | Good | 10 | 25% |
| 100-150 | 3 | Average | 16 | 40% |
| 150-200 | 4 | Poor | 7 | 17.5% |
| >200 | 5 | Extremely Poor | 6 | 15% |
